# Supplementary material
Source: Springer Nature journal article supplement (https://www.springermedizin.de/resource/supplementary/12913_2013_3740_MOESM12_ESM.pdf/9532248)
Supplement: MOESM12 [file 9532248]

# Protocol for Study Intervention

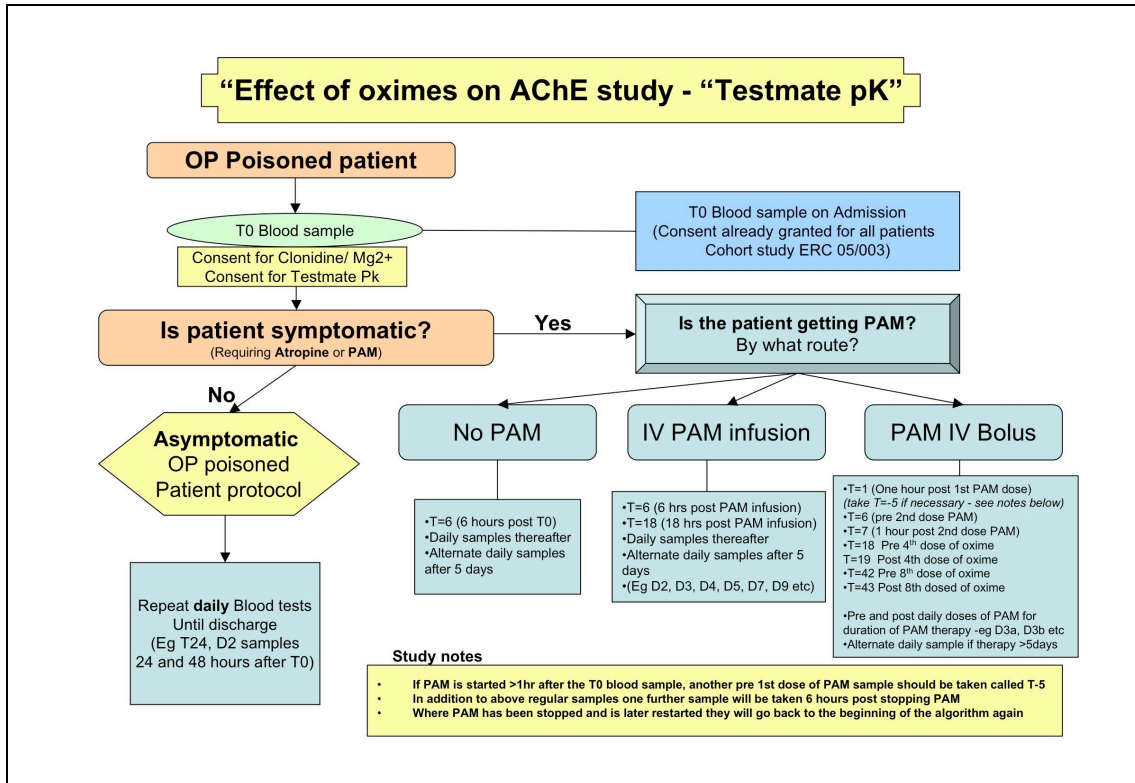

Appendix 1.1 – Protocol for blood testing of consenting patients according to the type of poison ingested and whether the patient is receiving oximes

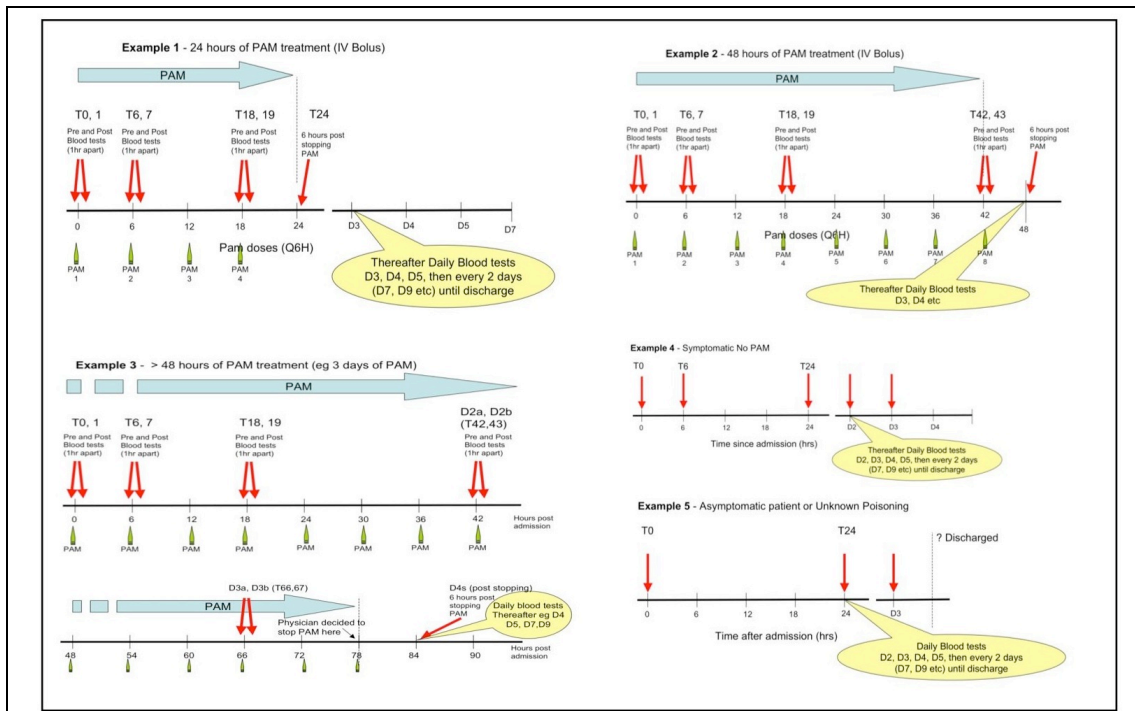

Appendix 1.2 – Time schedule of blood testing for AChE levels
